# Supplementary material for: Cancer of unknown primary (CUP) through the lens of precision oncology – a single institution perspective
Source: Research Square preprint supplement (doi:10.21203/rs.3.rs-2574066/v1), 2023-02-14
Supplement: Supplementary file 1 [file 2770be54850f158517b040a8.xlsx]

## Sheet: Tabelle1
Pat-Nr	Target	Therapy	NCT	ESCAT	Note
8	NF2 Mutation	mTOR	2B	IIIB
9	STK11 Mutation	mTOR	2C	IIIB
14	TMB high	ICI	1C	IIIA
17	TMB high	ICI	1C	IIIA
18	TMB high	ICI	1C	IIIA
19	KRAS Mutation	Trametinib/Hydroxychloroquin	1C	IIIB
23	ErbB2 Mutation	Trastuzumab/Lapatinib	1A	IIIA
25	PIK3CA Mutation	mTOR	2C	IIIB
26	IDH2 Mutation	Enasidenib	2A	IIIA
28	HER2 & HER3 mt	HER-directed Tx	2C	IIIB
33	EML-ALK	Alk-Inhibitor	1C	IIIA
43	TMB high	ICI	1C	IIIA
44	AR Mutation	Antiandrogen	2C		preclinical data
47	NRAS Mutation /TMB high	ICI	1C	IIIA
50	ErbB2 Mutation	pan-Her TKI			clinical NSCLC
51	BRAF V600E	BRAF/MEK Inhibitor	1C	IC
54	FGFR1 Mutation	FGFR1 directed Tx	2C	IIIB
55	TMB intermediate+PDL1 pos	ICI bereits erhalten	N/A	N/A
61	CDK4 Amplifikation	CDK4/6i	2B	IIIA
62	PIK3CA Mutation	mTOR	2C	IIIB
65	PIK3CA, IDH1	mTOR, Ivosidenib	2A	IIIA
66	FGFR3 Mutation	FGFR inhibitor	3	IV
67	FGFR2-Fusion	Pemigatinib	2A	IIIA
68	MSI	ICI	1C	IIIA
70	BRAF Mutation	Sorafenib/Trametinib	2C	IIIA
72	TMB high	ICI	1C	IIIA
74	PIK3CA	mTOR	2A	IIIA
76	mTOR/AKT	Everolimus/Exemestan	2B	IIIA
79	ARID1A	ICI	2B	IIIA
