# Supplementary material for: Cancer of unknown primary (CUP) through the lens of precision oncology – a single institution perspective
Source: Research Square preprint supplement (doi:10.21203/rs.3.rs-2574066/v1), 2023-02-14
Supplement: Supplementary file 2 [file a08fffa4db5248f486c76fda.xlsx]

## Sheet: Table 1
Table 1 Patient baseline characteristics
Demographic variable	MTB
	N = 61
Age, years
Median	60
Range	23–85
Gender, n (%)
Men	35 (57,4)
Women	26 (42,6)
Panel, n (%)
Oncomine	47 (77,0)
FMI	9 (14,8)
Other	5 (8,2)
Tissue origin, n (%)
Adenocarinoma	42 (68,9%)
Squamous cell carcinoma	4 (6,6)
Neuroendocrine carcinoma	2 (3,3)
Sarcomatoid carcinoma	5 (8,2%)
Others	8 (13,1%)
Alterations, n (%)
yes	45 (73,8)
no	16 (26,2)
MTB recommendation, n (%)
yes	29 (64,4)
no	16 (35,6)
Implementation of recommended therapy, n (%)
yes	4 (13,8)
no	25 (86,2)
Number of previous therapy lines, n (%)
0	14 (23,0)
1	25 (41,0)
2	7 (11,5)
3	3 (4,9)
4	1 (1,6)
Unknown	11 (18,0)
